# Supplementary material for: Epilepsy and Language Development in 8–36-Month-Old Toddlers with Tuberous Sclerosis Complex
Source: MDPI journal article supplement (doi:10.3390/jcm11154564), 2022-08-04
Supplement: s1 [file s1]

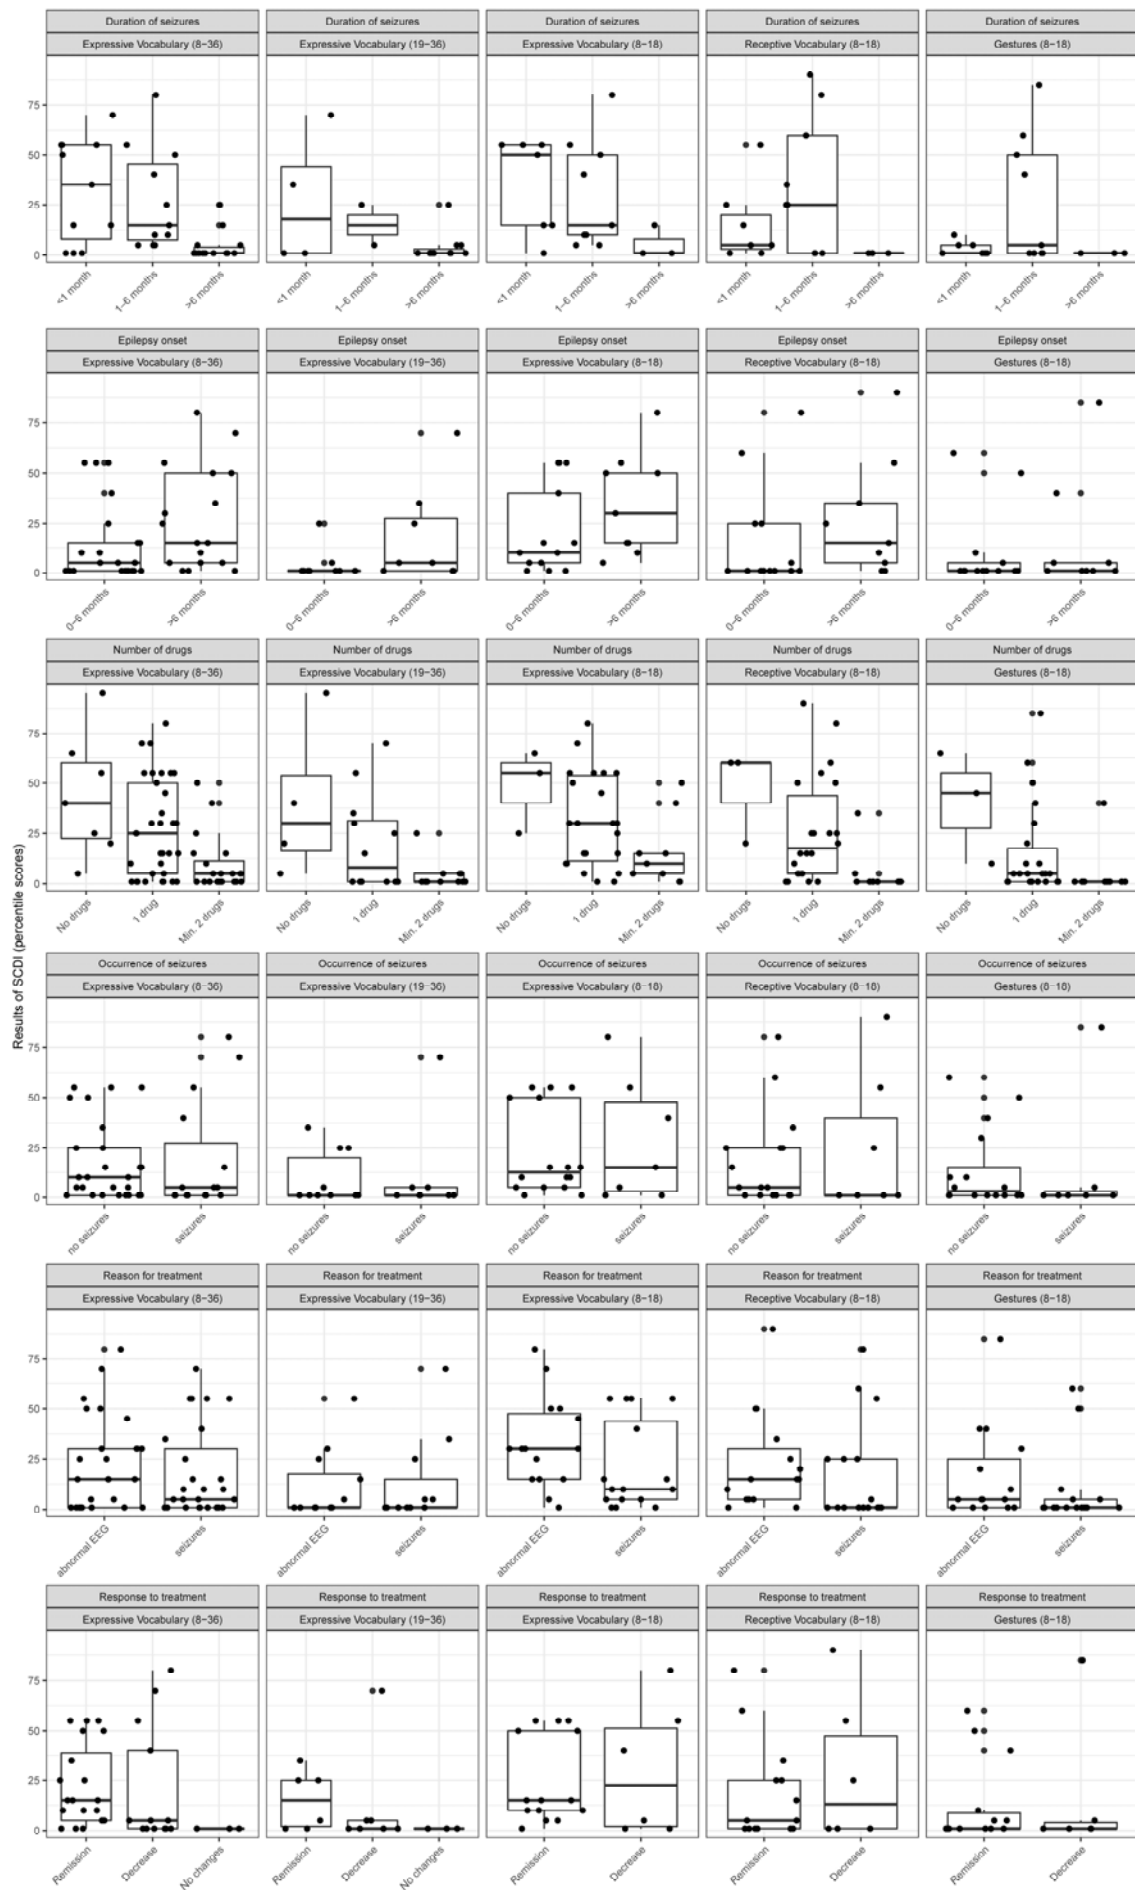

**Figure S1:** Quartile distribution of results: Duration of seizures, response to treatment and number of drugs. The Y axis indicates the SCDI; percentile score. On the X axis there are names of groups of individual variables.
